# Supplementary material for: Fungicide Dissipation Kinetics and Dietary Exposure Risk Assessment in Squash Fruit and Leaf
Source: MDPI journal article supplement (doi:10.3390/foods12061291), 2023-03-17
Supplement: s1 [file s1]

Table S1. Chemical structures and physicochemical properties of the four pesticides.

| Pesticide     | Chemical structure                                                                  | Molecular weight | Vapor pressure (mPa)                                                              |
|---------------|-------------------------------------------------------------------------------------|------------------|-----------------------------------------------------------------------------------|
| Dimethomorph  | 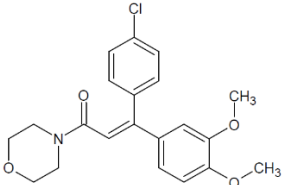   | 387.9            | $9.7 \times 10^{-4}$ ; (E)-isomer<br>$1.0 \times 10^{-3}$ ; (Z)-isomer<br>(25 °C) |
| Mandipropamid |   | 411.9            | $9.4 \times 10^{-4}$ (25°C)                                                       |
| Myclobutanil  |  | 288.8            | $1.98 \times 10^{-1}$ (20°C)                                                      |
| Metalaxyl     |  | 279.3            | 0.75 (25°C)                                                                       |

Table S2. Greenhouse air temperature, humidity, and pesticide treatment date during cultivation of squash plants.

| Date           | Temperature (°C) |         |         | Average humidity (%) | Pesticide treatment and sampling date        |
|----------------|------------------|---------|---------|----------------------|----------------------------------------------|
|                | Minimum          | Maximum | Average |                      |                                              |
| April 6, 2021  | 4.3              | 35.2    | 17.0    | 68.6                 | First treatment                              |
| April 7, 2021  | 3.9              | 36.2    | 17.6    | 63.0                 |                                              |
| April 8, 2021  | 3.5              | 33.6    | 16.7    | 63.8                 |                                              |
| April 9, 2021  | 2.8              | 37.5    | 15.9    | 65.4                 |                                              |
| April 10, 2021 | 3.8              | 35.3    | 17.1    | 67.1                 |                                              |
| April 11, 2021 | 5.0              | 36.5    | 19.0    | 68.4                 |                                              |
| April 12, 2021 | 11.5             | 26.8    | 15.7    | 90.9                 | Second treatment                             |
| April 13, 2021 | 7.9              | 40.0    | 20.1    | 81.2                 |                                              |
| April 14, 2021 | 4.1              | 31.4    | 16.1    | 66.0                 |                                              |
| April 15, 2021 | 2.1              | 32.8    | 15.5    | 67.3                 |                                              |
| April 16, 2021 | 6.0              | 27.8    | 13.7    | 88.8                 |                                              |
| April 17, 2021 | 4.8              | 36.7    | 14.1    | 73.3                 |                                              |
| April 18, 2021 | 4.7              | 31.2    | 15.6    | 70.2                 | Third treatment and 0 day sampling after 2 h |
| April 19, 2021 | 2.2              | 34.7    | 16.0    | 63.8                 |                                              |
| April 20, 2021 | 3.8              | 33.8    | 18.1    | 66.0                 |                                              |
| April 21, 2021 | 6.5              | 41.0    | 22.1    | 65.6                 |                                              |
| April 22, 2021 | 14.1             | 38.0    | 22.4    | 63.5                 |                                              |
| April 23, 2021 | 14.3             | 27.7    | 19.1    | 53.3                 | 3 days sampling                              |
| April 24, 2021 | 10.2             | 36.2    | 20.0    | 69.8                 |                                              |
| April 25, 2021 | 7.7              | 38.0    | 20.9    | 67.5                 | 5 days sampling                              |
| April 26, 2021 | 6.5              | 33.3    | 19.3    | 64.0                 |                                              |
| April 27, 2021 | 11.3             | 29.1    | 18.5    | 77.2                 | 7 days sampling                              |
| April 28, 2021 | 11.0             | 27.4    | 18.4    | 76.7                 |                                              |
| April 29, 2021 | 9.5              | 29.6    | 18.2    | 75.1                 |                                              |
| April 30, 2021 | 10.7             | 29.8    | 17.5    | 82.6                 |                                              |
| May 1, 2021    | 10.1             | 36.6    | 15.8    | 88.9                 |                                              |
| May 2, 2021    | 7.2              | 32.2    | 17.7    | 71.8                 |                                              |

|             |      |      |      |      |                  |
|-------------|------|------|------|------|------------------|
| May 3, 2021 | 4.1  | 32.9 | 18.5 | 69.0 |                  |
| May 4, 2021 | 11.2 | 25.8 | 18.2 | 75.2 | 14 days sampling |
